# Supplementary material for: Endogenic mantle-driven orogenic evolution: Slab rollback dynamics as the architect of retreating accretionary systems
Source: Research Square preprint supplement (doi:10.21203/rs.3.rs-6210811/v1), 2025-04-17
Supplement: Supplementary file 1 [file 4687c9d7d4862fdcc411dc60.xlsx]

## Sheet: Sheet1
Table S1. Existed detrital zircon data for the lower-middle Paleozoic sedimentary sequences reported from different terranes of the Altai Zone.
Sample ID	Rock-type	Unit	Terrane	Latitude	Longitude	YSG (Ma)	MLA (Ma)	Data source	sample number in Fig. S2
Lower Paleozoic
GC231	Fine-grained polymict conglomerate	Zuunnuruu Formation	Hovd Zone	47°5′15″N	92°27′4″E	491	502.07 ± 2.81	Soejono et al., 2018	1
GC131	Medium- to fine-grained sandstone	Zuunnuruu Formation	Hovd Zone	47°3′55″N	92°19′17″E	452	456.1 ± 10.0	Soejono et al., 2018	3
GC342	Medium- to fine-grained sandstone	Zuunnuruu Formation	Hovd Zone	47°8′50″N	92°4′31″E	478	482.62 ± 5.25	Soejono et al., 2018	2
GS028	greenschist	Bij Group	Hovd Zone	47°2′29″N	92°24′4″E	438	438.00 ± 5.96	Soejono et al., 2017
GS053	micaschist	Bij Group	Hovd Zone	47°6′20″N	92°6′30″E	437	437.45 ± 5.94	Soejono et al., 2017
GS067	paragneiss	Bij Group	Hovd Zone	47°6′41″N	92°6′40″E	420	442.85 ± 1.82	Soejono et al., 2017
GS184	paragneiss	Bij Group	Hovd Zone	47°13′30″N	91°55′37″E	456	519.8 ± 17.6	Soejono et al., 2017
L07BH16	sandstone	Habahe Group	Chinese Altai	48°44′18″N	86°51′58″E	434	441.92 ± 5.73	Long et al., 2010	32
L07BH27	slate	Habahe Group	Chinese Altai	48°42′5″N	86°59′49″E	431	435.13 ± 4.31	Long et al., 2010	36
L07BH01	siltstone	Habahe Group	Chinese Altai	48°40′30″N	86°45′32″E	436	438.93 ± 4.05	Long et al., 2010	34
L07BH08	slate	Baihaba Formation	Chinese Altai	48°42′6″N	86°50′6″E	433	436.71 ± 3.33	Long et al., 2010	35
BU19-3	mica schist	Habahe Group	Chinese Altai	48°21′21″N	87°8′13″E	462	493.60 ± 4.70	Jiang et al., 2011	21
CH8	Grt-mica-schist	Habahe Group	Chinese Altai	48°7′27″N	87°17′19″E	446	452.5 ± 16.8	Jiang et al., 2011	29
CH12	g-sill-bearing paragneiss	Habahe Group	Chinese Altai	47°58′30″N	87°28′58″E	485	527.75 ± 6.12	Jiang et al., 2011	19
AL07	mica-schist	Kulumuti Group	Chinese Altai	47°35′5″N	88°51′48″E	465	471.28 ± 4.06	Wang et al., 2014	24
AL10	mica-schist	Kulumuti Group	Chinese Altai	47°36′3″N	88°52′30″E	464	466.31 ± 9.15	Wang et al., 2014	25
KK03	mica-schist	Habahe Group	Chinese Altai	47°10′53″N	89°46′49″E	468	474.00 ± 8.49	Long et al., 2007	23
BH09	Siltstone	Habahe Group	Chinese Altai	48°32′20″N	86°42′17″E	441	442.2 ± 19.6	Long et al., 2007	31
BU13	sill-bearing paragneiss	Habahe Group	Chinese Altai	48°16′11″N	87°03′58″E	446	465.60 ± 5.68	Sun et al., 2008	26
BU14	amp-bearing paragneiss	Habahe Group	Chinese Altai	48°19′15″N	87°6′41″E	426	447.00 ± 6.57	Sun et al., 2008	30
18XJ1	fine-grained granitic gneiss	Habahe Group	Chinese Altai	47°0′44″N	89°45′17″E	491	504.24 ± 3.30	Cui et al., 2022	20
18XJ3	medium-grained plagioclase gneiss	Habahe Group	Chinese Altai	46°58′58″N	89°44′24″E	463	463.0 ± 13.9	Cui et al., 2022	27
18XJ6	heteroblastic biotite plagioclase gneisses	Habahe Group	Chinese Altai	47°0′44″N	89°40′58″E	435	439.84 ± 5.97	Cui et al., 2022	33
18XJ7	medium- to fine-grained biotite plagioclase gneisses	Habahe Group	Chinese Altai	46°58′46″N	89°40′38″E	457	457.0 ± 15.2	Cui et al., 2022	28
18XJ14-5	mylonitized biotite plagioclase gneisses	Habahe Group	Chinese Altai	47°2′30″N	89°39′53″E	466	480.60 ± 7.98	Cui et al., 2022	22
09MG77	sandstone	Tugrug formation	Mongolian Altai	45°42ʹ36ʺN	94°52ʹ52ʺE	443	443.00 ± 5.59	Jiang et al., 2017	15
12MG51	mica-schist	Tugrug formation	Mongolian Altai	45°34ʹ25ʺN	95°49ʹ58ʺE	457	461.7 ± 13.3	Jiang et al., 2017	13
13MG233	sandstone	Tugrug formation	Mongolian Altai	45°23ʹ14ʺN	96°41ʹ27ʺE	437	462.76 ± 6.92	Jiang et al., 2017	12
13MG243	sandstone	Tugrug formation	Mongolian Altai	45°26ʹ17ʺN	96°56ʹ18ʺE	429	437.7 ± 13.0	Jiang et al., 2017	12
MK06	Siltstone	-	Mongolian Altai	47°51ʹ18ʺN	91°14″17″E	429	434.24 ± 7.67	Long et al., 2019	17
MK11	Schist	-	Mongolian Altai	47°19ʹ35″N	91°14″17″E	440	440.1 ± 12.2	Long et al., 2019	14
MK14	Sandstone	-	Mongolian Altai	47°38ʹ13″N	90°59″10″E	438	440.26 ± 6.25	Long et al., 2019	16
MK15	Siltstone	-	Mongolian Altai	47°39ʹ52″N	90°53″44″E	420	429.6 ± 18.6	Long et al., 2019	18
MK16	sandstone	-	Mongolian Altai	47°41ʹ19″N	90°47″27″E	448	470.61 ± 4.99	Long et al., 2019	11
Middle Paleozoic
GB487	Coarse-grained polymict conglomerate	Tsetseg Formation	Hovd Zone	47°1′5″N	92°22″46″E	441	464.24 ± 2.35	Soejono et al., 2018	4
GC041	Coarse-grained polymict conglomerate	Tsetseg Formation	Hovd Zone	47°3′55″N	91°48″19″E	415	416.82 ± 6.80	Soejono et al., 2018	5
GC040	silty shale	Sagsai Formation	Hovd Zone	47°3′38″N	91°47″55″E	365	368.34 ± 8.43	Soejono et al., 2018	8
GC163	Medium-grained metaconglomerate	Sagsai Formation	Hovd Zone	47°6′42″N	92°16″16″E	397	394.51 ± 3.92	Soejono et al., 2018	6
GC082	Fine-grained greywacke	Sagsai Formation	Hovd Zone	47°5′22″N	91°53″34″E	376	389.60 ± 5.98	Soejono et al., 2018	7
GS189	fine-grained metasandstone	Sagsai Formation	Hovd Zone	47°8′19″N	91°52″49″E	387	387.9 ± 12.1	Soejono et al., 2018	9
GC036	fine-grained sandstone	Sagsai Formation	Hovd Zone	47°7′54″N	91°54″42″E	357	360.39 ± 9.75	Soejono et al., 2018	10
KK01	mylonite	Kangbutiebao Formation	Chinese Altai	46°59′49″N	89°44″42″E	429	429.00 ± 4.84	Long et al., 2007	37
AR12	Garnet-Sillimanite Gneiss	Altai Formation	Chinese Altai	47°34′54″N	88°25′11″E	386	389.11 ± 2.74	Long et al., 2007	38
19XJ98-1	fine-grained sandstone	Altai Formation	Chinese Altai	47°54′20″N	88°7″20″E	354	354.0 ± 12.5	not published	41
19XJ93-1	bt-qtz schist	Altai Formation	Chinese Altai	47°33′8″N	88°39″4″E	350.1	355.12 ± 6.01	not published	40
19XJ96-1	sandstone	Altai Formation	Chinese Altai	47°44′55″N	88°17′52″E	350.8	351.5 ± 19.1	not published	42
19XJ92-1	bt schist	Altai Formation	Chinese Altai	47°32′15″N	88°39′11″E	363.8	367.3 ± 10.4	not published	39
YGS: Youngest Grain Age
MLA: Maximum Likelihood Age, which is calculated with isoplotR and chosen as the maximum depositional age in this study. Detailed information can be found in Vermeesch, (2018, 2021).
References:
Soejono, I., Čáp, P., Míková, J., Janoušek, V., Buriánek, D., and Schulmann, K., 2018, Early Palaeozoic sedimentary record and provenance of flysch sequences in the Hovd Zone (western Mongolia): Implications for the geodynamic evolution of the Altai accretionary wedge system: Gondwana Research, v. 64, p. 163-183.
Long, X., Yuan, C., Sun, M., Xiao, W., Zhao, G., Wang, Y., Cai, K., Xia, X., and Xie, L., 2010, Detrital zircon ages and Hf isotopes of the early Paleozoic flysch sequence in the Chinese Altai, NW China: new constrains on depositional age, provenance and tectonic evolution: Tectonophysics, v. 480, no. 1-4, p. 213-231.
Sun, M., Yuan, C., Xiao, W., Long, X., Xia, X., Zhao, G., Lin, S., Wu, F., and Kröner, A., 2008, Zircon U–Pb and Hf isotopic study of gneissic rocks from the Chinese Altai: Progressive accretionary history in the early to middle Palaeozoic: Chemical Geology, v. 247, no. 3-4, p. 352-383.
Cui, X., Sun, M., Zhao, G., Yao, J., Zhang, Y., and Han, Y., 2022, An early Paleozoic active continental margin basin along the southern Chinese Altai: Evidence from high-grade paragneisses in the Fuyun region: American Journal of Science, v. 322, no. 2, p. 190-224.
Jiang, Y., Schulmann, K., Kröner, A., Sun, M., Lexa, O., Janoušek, V., Buriánek, D., Yuan, C., and Hanžl, P., 2017, Neoproterozoic‐Early Paleozoic Peri‐Pacific Accretionary Evolution of the Mongolian Collage System: Insights From Geochemical and U‐Pb Zircon Data From the Ordovician Sedimentary Wedge in the Mongolian Altai: Tectonics, v. 36, no. 11, p. 2305-2331.
Wang, Y., Long, X., Wilde, S. A., Xu, H., Sun, M., Xiao, W., Yuan, C., and Cai, K., 2014, Provenance of Early Paleozoic metasediments in the central Chinese Altai: Implications for tectonic affinity of the Altai-Mongolia terrane in the Central Asian Orogenic Belt: Lithos, v. 210-211, p. 57-68.
Jiang, Y., Schulmann, K., Kröner, A., Sun, M., Lexa, O., Janoušek, V., Buriánek, D., Yuan, C., and Hanžl, P., 2017, Neoproterozoic‐Early Paleozoic Peri‐Pacific Accretionary Evolution of the Mongolian Collage System: Insights From Geochemical and U‐Pb Zircon Data From the Ordovician Sedimentary Wedge in the Mongolian Altai: Tectonics, v. 36, no. 11, p. 2305-2331.
Long, X., Luo, J., Sun, M., Wang, X., Wang, Y., Yuan, C., and Jiang, Y., 2019, Detrital zircon U-Pb ages and whole-rock geochemistry of early Paleozoic metasedimentary rocks in the Mongolian Altai: Insights into the tectonic affinity of the whole Altai-Mongolian terrane: GSA Bulletin.

## Sheet: Sheet2
Table S2. Existed early-middle Paleozoic U-Pb ages and isotopic data for the magmatic rocks reported from different terranes of the Lake Zone and Altai Zone.
Granitoids
Sample ID	Rock-type	Rock classification	Lithological units	Zircon dating method	Ages (Ma)	εNd(T)	zircon εHf(T)	Data source	sample number in Fig. 3
Zavkhan terrane
DS34	white, coarsely crystalline unnamed gneissic granite	I-type	Khavchig complex	CA-ID-TIMS	507.1 ± 0.32			Bold et al., 2016	[1]
U12001	biotite granite gneiss	I-type		CA-ID-TIMS	509.3			Bold et al., 2016	[1]
US11	biotite-hornblende-quartz diorite	I-type		LA-ICP-MS	496 ± 7			Bold et al., 2016	[1]
F1128A	pink unnamed granite	alkaline	Numrug complex	CA-ID-TIMS	442.1 ± 0.19			Bold et al., 2016	[2]
Lake Zone
C-5-66.3	medium-grained amphibole quartz diorite	I-type	Three Hills massif	U-Pb LA-ICP-MS	551 ± 13	7.6		Rudnev et al., 2012
H0622	gabbrodiorite		Zamtyn Nuruu Complex	U-Pb LA-ICP-MS	542 ± 4	2.0 to 2.5	+7.9 to +8.6	Buriánek et al., 2017
109-06	plagiogranite	I-type	Bumbat-Khairkhan pluton	U-Pb SHRIMP-II	535 ± 6	6.9 to 8.8		Rudnev et al., 2012, 2013
RM-46-05	tonalite-plagiogranite	I-type	Kharanur pluton	U-Pb SHRIMP-II	531 ± 10	7.4		Rudnev et al., 2009	[1]
-	high-alumina plagiogranitoid	I-type	Tugrik pluton	U-Pb SHRIMP-II	530 ± 7	7.5		Rudnev et al., 2013	[1]
RM-72-06	biotite–amphibole quartz diorites	I-type	Kharanur pluton	U-Pb SHRIMP-II	529 ± 6	7.9		Rudnev et al., 2009	[1]
C-9-45.5	Diorite-tonalite-plagiogranite	I-type	Bumbat-Khairkhan pluton	U-Pb SHRIMP-II	524 ± 10	6.9		Rudnev et al., 2013	[1]
RM-21-05	amphibole–biotite tonalite	I-type	Sharatologoi pluton	U-Pb SHRIMP-II	519 ± 8	6.5 to 6.6		Rudnev et al., 2009	[1]
XX1	quartz diorites	I-type	East Tannu-Ola batholith	U-Pb LA-ICP-MS	518 ± 2	6.9		Mongush et al., 2011	[1]
V005	biotite–amphibole tonalite	I-type	Khantaishir Magmatic Complex	U-Pb LA-ICP-MS	516 ± 2	-0.6	+2.5 to +6.2	Janoušek et al., 2018	[1]
EKH6/1	tonalite	I-type	Western Bayan Khairkhan Massif	U-Pb LA-ICP-MS	514 ± 8			Yarmolyuk et al., 2011	[1]
Mo388	leucocratic gneiss	I-type	Baga Bogd	U-Pb LA-ICP-MS	502 ± 6			Demoux et al., 2009	[1]
Mo380	biotite granite-gneiss	I-type	Baga Bogd	U-Pb LA-ICP-MS	501 ± 4			Demoux et al., 2009	[1]
Mo286	granodiorite gneiss	I-type	Baga Bogd	U-Pb LA-ICP-MS	499 ± 3			Demoux et al., 2009	[1]
Mo283	dioritic orthogneiss	I-type	Baga Bogd	U-Pb LA-ICP-MS	498 ± 3			Demoux et al., 2009	[1]
KhR-1/10	tonalite	I-type	Khirgisnur massif	U-Pb TIMS	495 ± 2			Kovalenko et al., 2004	[1]
RM-7-05	amphibole–biotite tonalites; tholeiitic low-Al plagiogranites	M-type	Sharatologoi pluton	U-Pb LA-ICP-MS	494 ± 10	6.6		Rudnev et al., 2009	[1]
KhR-1/12	biotite and leucocratic granites	I-type	Airygnur massif	U-Pb LA-ICP-MS	465 ± 11			Kovalenko et al., 2004	[3]
V002c	biotite–amphibole granodiorite	I-type	Khantaishir Magmatic Complex	U-Pb LA-ICP-MS	459 ± 3			Janoušek et al., 2018	[3]
RM-51-05	biotite granites	I-type	Kharanur pluton	U-Pb LA-ICP-MS	459 ± 10	5.1		Rudnev et al., 2009	[3]
EKH6/3	subalkaline granite	alkaline	Bayan Khairkhan Massif	U-Pb LA-ICP-MS	449 ± 1			Yarmolyuk et al., 2011	[4]
KhBU-5003	granodiorite	I-type	west of Khaldzan-Buregtei Mount	U-Pb LA-ICP-MS	441 ± 2			Kovalenko et al., 2004	[3]
KhBU-4327	peralkaline granite sample	alkaline	Khaldzan-Buregtei massif	U-Pb LA-ICP-MS	391 ± 2			Kovalenko et al., 2004	[5]
KhBU-4340	syenite	alkaline	Khaldzan-Buregtei massif	U-Pb LA-ICP-MS	391 ± 1			Kovalenko et al., 2004	[5]
Hovd Zone
GS 208	orthogneiss	I-type	Khuurai Tsenkher Gol Complex	U-Pb LA-ICP-MS	476 ± 5	2.6		Soejono et al., 2017	[6]
GS 061	orthogneiss	I-type	Khuurai Tsenkher Gol Complex	U-Pb LA-ICP-MS	467 ± 4			Soejono et al., 2017	[6]
GS 032	quartz monzodiorite	alkaline	Khuurai Tsenkher Gol Complex	U-Pb LA-ICP-MS	430 ± 3			Soejono et al., 2017	[7]
MK01	quartz diorite	I-type	Hovd batholith	U-Pb LA-ICP-MS	398 ± 6		+4.0 to +8.8	Cai et al., 2015	[8]
MK80	Mylonitic granite	I-type	South Togrogiin Ekh Bag pluton	U-Pb LA-ICP-MS	382 ± 5		+4.5 to +11.7	Cai et al., 2015	[8]
MK83	Granite	I-type	Southeast Togrogiin Ekh Bag pluton	U-Pb LA-ICP-MS	372 ± 3		+8.6 to +11.9	Cai et al., 2015	[8]
MK78	Grandiorite	I-type	North Togrogiin Ekh Bag pluton	U-Pb LA-ICP-MS	369 ± 3		+7.8 to +12.8	Cai et al., 2015	[8]
1806A	hbl-biotite granite	I-type	Group 3	U-Pb LA-ICP-MS	366 ± 3			Boldbaatar et al., 2022	[8]
MK40	gneissic biotite granite	I-type	North Bulgan batholith	U-Pb LA-ICP-MS	365 ± 4		+7.6 to +13.9	Cai et al., 2015	[8]
MK57	Granite	I-type	Bodonchin River batholith	U-Pb LA-ICP-MS	360 ± 6		+10.6 to +16.9	Cai et al., 2015	[8]
MK54	Grandiorite	I-type	Bodonchin River batholith	U-Pb LA-ICP-MS	354 ± 4		+11.7 to +15.2	Cai et al., 2015	[8]
MK41	fine-grained diorite	I-type	North Bulgan batholith	U-Pb LA-ICP-MS	350 ± 3		+5.3 to +11.2	Cai et al., 2015	[8]
Mongolian Altai
MK24	Granite	I-type	Bulgan Batholith	U-Pb LA-ICP-MS	393 ± 4		+0.7 to +7.6	Cai et al., 2015	[9]
2107	ms-tur granite	I-type	Group 1	U-Pb LA-ICP-MS	387 ± 4			Boldbaatar et al., 2022	[9]
2005A	biotite-ms granite	I-type	Group 1	U-Pb LA-ICP-MS	381 ± 13			Boldbaatar et al., 2022	[9]
2204A	biotite-ms granite	I-type	Group 1	U-Pb LA-ICP-MS	375 ± 4			Boldbaatar et al., 2022	[9]
1901A	Crd–biotite granite	S-type	Group 2	U-Pb LA-ICP-MS	369 ± 5			Boldbaatar et al., 2022	[9]
2108	leucogranite	I-type	Group 1	U-Pb LA-ICP-MS	361 ± 4			Boldbaatar et al., 2022	[9]
1808	biotite granite	I-type	Group 2	U-Pb LA-ICP-MS	353 ± 5			Boldbaatar et al., 2022	[9]
Chinese Altai
DB01-04	granodiorite	S-type	Dongbute-West pluton	U-Pb LA-ICP-MS	507 ± 6	-2.0 to -2.4		Zhang et al., 2017	[10]
Areletuobie-West-01	granitoids	S-type	Areletuobie West	U-Pb LA-ICP-MS	485.8 ± 5	-3.4 to -2.3	0 to +6.7	Zhang et al., 2017	[10]
Akemeiketiepu-01	granite	S-type	Akemeiketeipu	U-Pb LA-ICP-MS	484.4 ± 3	-1.3 to -1.0	-5.6 to +3.6	Zhang et al., 2017	[10]
ABG01	gneissic granite	I-type	Abagong separated body	SHRIMP U-Pb	462.5 ± 4			Liu et al., 2008	[11]
161/1	tonalitic and granodioritic gneisses	I-type	Qiemuerqieke	SHRIMP U-Pb	462 ± 10	-4.4 to -3.3		Wang et al., 2006	[11]
BU12	gneissic granodiorite	I-type	Buerjin	U-Pb LA-ICP-MS	453 ± 5		+2.3 to +12.6	Sun et al., 2008	[11]
Keketuohai-East-01	granitoids	S-type	Keketuohai-East	U-Pb LA-ICP-MS	446.2 ± 4	-1.8 to -1.4	+2.1 to +7.7	Zhang et al., 2017	[11]
CH15	gneissic granite	I-type	Tarlang Batholith	U-Pb LA-ICP-MS	432 ± 7	-2.7 to -0.7	+2.6 to +6.8	Yuan et al., 2007	[12]
Bu-3	medium grained granite	I-type	Buerjin	U-Pb LA-ICP-MS	425 ± 8		+3.3 to +10.9	Sun et al., 2008	[12]
Jaertasisayi-01	granitoids	S-type	Jaertasiayi	U-Pb LA-ICP-MS	425 ± 3	-3.4 to -2.6	+1.1 to +4.0	Zhang et al., 2017	[12]
ALT63	grey biotite granite	I-type	Kurmutu Pluton	U-Pb LA-ICP-MS	421 ± 6		+6.4 to +9.6	Cai et al., 2011a	[12]
KW02	peralumious granite	S-type	Kuwei batholith	U-Pb LA-ICP-MS	419 ± 9	-1.8 to +1.7		Cai et al., 2011b; Yu et al., 2017	[12]
FY-77	two-mica granite	I-type	Keketuohai Batholith	U-Pb LA-ICP-MS	416 ± 9			Yuan et al., 2007	[12]
3045	mu‐bearing monzogranite	I-type	Kuerti	SHRIMP U-Pb	416 ± 5	0.5		Wang et al., 2006	[12]
HM01	peralumious granite	S-type	Hemu batholith	U-Pb LA-ICP-MS	412 ± 7	-3.3 to -1.8	-4.7 to +9.7	Cai et al., 2011b	[12]
Bu-1	leucogranite	I-type	Buerjin	U-Pb LA-ICP-MS	412 ± 5		+2.8 to +15.5	Sun et al., 2008	[12]
ALT13	weakly foliated leucogranite	I-type	Kezgar Pluton	U-Pb LA-ICP-MS	411 ± 11		+3.3 to +6.1	Cai et al., 2011a	[12]
18XJ8–1	tonalitic gneiss	I-type	Fuyun	U-Pb LA-ICP-MS	411 ± 1.8	-1.6	+1.8 to +3.9	Cui et al., 2020a	[12]
18XJ4-1	granodioritic gneiss	I-type	Fuyun	U-Pb LA-ICP-MS	408 ± 1.8		+1.7 to +3.7	Cui et al., 2020a	[12]
Kayierte-01	granitoids	S-type	Kayierte	U-Pb LA-ICP-MS	407.1 ± 3	-2.5 to -1.9	-2.2 to +5.1	Zhang et al., 2017	[12]
18XJ5-3	dioritic-tonalitic gneiss	I-type	Fuyun	U-Pb LA-ICP-MS	406 ± 2.1	0.9	+3.1 to +8.0	Cui et al., 2020a	[12]
ARJ01	medium-grained granodiorite	I-type	Daqiao Batholith	U-Pb LA-ICP-MS	404 ± 4		+6.6 to +10.6	Cai et al., 2011c	[12]
Keketuohai-North-01	granitoids	S-type	Keketuohai North	U-Pb LA-ICP-MS	404 ± 3	-2.0 to -1.8	+2.4 to +8.7	Zhang et al., 2017	[12]
BH7-3	medium-grained biotite granite	I-type	Tiereketi Batholith	U-Pb LA-ICP-MS	404 ± 10		+1.6 to +10.2	Cai et al., 2011a	[12]
138/1	Gneissic tonalite	I-type	Aweitan	SHRIMP U-Pb	400 ± 6	-0.4		Wang et al., 2006	[13]
XX1-3	granite	-	Nuoerte intrusion		399 ± 12 to 412 ± 12			Lou, 1997	[13]
18XJ13–1	granitic gneiss	I-type	Fuyun	U-Pb LA-ICP-MS	398.9 ± 2.1	2.3	+6.2 to +10.0	Cui et al., 2020	[13]
4123	peralumious granite	S-type	Hanas batholith	U-Pb LA-ICP-MS	398 ± 5			Tong et al., 2007	[13]
18XJ14–1	trondhjemitic gneiss	I-type	Fuyun	U-Pb LA-ICP-MS	397.5 ± 2.1	2.9	+5.4 to +8.9	Cui et al., 2020a	[13]
CH1	coarse-grained granodiorite	I-type	Chonghur Batholith	U-Pb LA-ICP-MS	397 ± 3		0 to +7.5	Cai et al., 2011a	[13]
HM2-5	peralumious granite	S-type	Youyifeng batholith	SHRIMP U-Pb	393 ± 7	-0.9 to -1.0	+4.1 to +12.8	Cai et al., 2011b	[13]
Keketale-01	granitoids	S-type	Keketale	U-Pb LA-ICP-MS	391.8 ± 2	-6.1 to -5.5	+0.4 to +4.5	Zhang et al., 2017	[13]
BH3-1	medium-grained granodiorite	I-type	Habahe Batholith	U-Pb LA-ICP-MS	389 ± 5		+2.3 to +6.5	Cai et al., 2011a	[13]
ARJ12	two-mica gneissic granite	I-type	Wukuang Pluton	U-Pb LA-ICP-MS	381 ± 5		+2.6 to +5.8	Cai et al., 2011c	[13]
Bu-2	mylonite	I-type	Buerjin	U-Pb LA-ICP-MS	381 ± 4		+11 to +17	Sun et al., 2008	[13]
W9710	gneissic granite	I-type	Wuliqi	TIMS zircon U-Pb	371 ± 1	0.6		Wang et al., 2006	[13]
ALT01	medium-grained biotite granite	I-type	Altay Batholith	U-Pb LA-ICP-MS	368 ± 13		+3.5 to +7.0	Cai et al., 2011a	[13]
FY-77	biotite granodiorite	I-type	Keketuohai Batholith	U-Pb LA-ICP-MS	359 ± 5			Yuan et al., 2007	[13]
Volcanic rocks
Sample ID	Rock-type	Terrane	Lithological units	Zircon dating method	Ages			Data source
-	bimodal series of rhyolite and basalt	Zavkhan terrane	Teel Formation		Late Ordovician to Silurian			Kilian et al., 2016	①
GB322A	amphibolite	Lake Zone	Baatar Formation	-	Cambrian			Burianek et al., 2022	②
GB443	basalt	Lake Zone	Baatar Formation	-	Cambrian			Burianek et al., 2022	②
GZ184	dolerite	Lake Zone	Baatar Formation	-	Cambrian			Burianek et al., 2022	②
GZ328	rhyolite	Lake Zone	Baatar Formation	-	Cambrian			Burianek et al., 2022	②
GB444C	dacite	Lake Zone	Baatar Formation	-	Cambrian			Burianek et al., 2022	②
-	felsic-intermediate volcanic rocks	Lake Zone	-	-	Devonian			Badarch et al., 2002	②
GB184	basalt	Hovd Zone	Zuunnuruu Formation	-	Ordovician			Burianek et al., 2022	③
GB267	basalt	Hovd Zone	Tsetseg Formation	-	Silurian			Burianek et al., 2022	⑤
GC325	basalt	Hovd Zone	Tsetseg Formation	-	Silurian			Burianek et al., 2022	⑤
GB158	basalt	Hovd Zone	Saigsai Formation	-	Devonian			Burianek et al., 2022	⑥
GB160	basalt	Hovd Zone	Saigsai Formation	-	Devonian			Burianek et al., 2022	⑥
GC083A	basalt	Hovd Zone	Saigsai Formation	-	Devonian			Burianek et al., 2022	⑥
H0654	basalt	Gobi Altai	Bayantsagaan Formation	-	Ordovician			Burianek et al., 2022	⑦
H1282	basalt	Gobi Altai	Bayantsagaan Formation	-	Ordovician			Burianek et al., 2022	⑦
O0209	basalt	Gobi Altai	Bayantsagaan Formation	-	Ordovician			Burianek et al., 2022	⑦
O0063	dacite	Gobi Altai	Takhilt Formation	-	Devonian			Burianek et al., 2022	⑧
O0205	basalt	Gobi Altai	Takhilt Formation	-	Devonian			Burianek et al., 2022	⑧
H1276	basalt	Gobi Altai	Takhilt Formation	-	Devonian			Burianek et al., 2022	⑧
H1279	basalt	Gobi Altai	Takhilt Formation	-	Devonian			Burianek et al., 2022	⑧
H0843	basalt	Gobi Altai	Gichgene Formation	-	Devonian			Burianek et al., 2022	⑨
X0555-7	rhyolite	Chinese Altai	Habahe Group	U-Pb SHRIMP-II	502 ± 7.2 Ma			Yang et al., 2011	⑩
HN01, HN16, JDY12	rhyolite	Chinese Altai	Habahe Group	U-Pb LA-MC-ICP-MS	443/445 ± 2 Ma			Wang et al., 2011	⑪
KKT 01	metarhyolite	Chinese Altai	Kangbutiebao Formation	U-Pb LA-MC-ICP-MS	410.5 ± 1.3 Ma			Yang et al., 2017	⑫
Abg178	metarhyolite	Chinese Altai	Kangbutiebao Formation	U-Pb SHRIMP-II	412.6 ± 3.5 Ma			Chai et al., 2009	⑫
BH39	dacite	Chinese Altai	Kangbutiebao Formation	U-Pb LA-MC-ICP-MS	411 ± 4 Ma			Chai et al., 2012	⑫
Abg53	metarhyolite	Chinese Altai	Kangbutiebao Formation	U-Pb SHRIMP-II	408.7 ± 5.3 Ma			Chai et al., 2009	⑫
15AT254-1	metatuff	Chinese Altai	Kangbutiebao Formation	U-Pb LA-MC-ICP-MS	405 ± 1.4 Ma			Broussolle et al., 2018	⑫
ASL-40, ASL11-42	Dacite	Chinese Altai	Ashele Formation	U-Pb LA-MC-ICP-MS	402 ± 6 Ma, 403 ± 2 Ma			Yang et al., 2014	⑫
Keyinbulake	metarhyolite	Chinese Altai	Kangbutiebao Formation	U-Pb LA-MC-ICP-MS	401 ± 4 Ma			Wan et al., 2011	⑫
CH09	metarhyolite	Chinese Altai	Kangbutiebao Formation	U-Pb LA-MC-ICP-MS	398.1 ± 1.8 Ma			Chai et al., 2012	⑫
KKT 09	metatuff	Chinese Altai	Kangbutiebao Formation	U-Pb LA-MC-ICP-MS	394.8 ± 1.9 Ma			Yang et al., 2017	⑫
750-5-2	basalt	Chinese Altai	Ashele Formation	U-Pb LA-MC-ICP-MS	388 ± 3.3 Ma			Yang et al., 2014	⑬
ASL-38	tuff	Chinese Altai	Ashele Formation	U-Pb LA-MC-ICP-MS	387 ± 4.2 Ma			Yang et al., 2014	⑬
sesk11-01, 11-04	pyritic rhyolite	Chinese Altai	Ashele Formation	U-Pb LA-MC-ICP-MS	382 ± 2 Ma			Yang et al., 2014	⑬
Ashele	metarhyolite	Chinese Altai	Ashele Formation	U-Pb LA-MC-ICP-MS	375 ± 3 Ma			Wan et al., 2011	⑬
ASL-77	dacite porphyry	Chinese Altai	Ashele Formation	U-Pb LA-MC-ICP-MS	379 ± 1 Ma			Yang et al., 2014	⑬
ASL01	basalt	Chinese Altai	Qiye Formation	U-Pb SIMS	376.2 ± 2.4 Ma			Ma et al., 2018	⑬
18XJ19-30	meta-basalt	Chinese Altai	Altai Formation	U-Pb LA-MC-ICP-MS	ca. 380 Ma			Cui et al., 2020b	⑭
References:
Rudnev, S. N., Izokh, A. E., Borisenko, A. S., Shelepaev, R. A., Orihashi, Y., Lobanov, K. V., and Vishnevsky, A. V., 2012, Early Paleozoic magmatism in the Bumbat-Hairhan area of the Lake Zone in western Mongolia (geological, petrochemical, and geochronological data): Russian Geology and Geophysics, v. 53, no. 5, p. 425-441.
Buriánek, D., Schulmann, K., Hrdličková, K., Hanžl, P., Janoušek, V., Gerdes, A., and Lexa, O., 2017, Geochemical and geochronological constraints on distinct Early-Neoproterozoic and Cambrian accretionary events along southern margin of the Baydrag Continent in western Mongolia: Gondwana Research, v. 47, p. 200-227.
Rudnev, S. N., Kovach, V. P., and Ponomarchuk, V. A., 2013, Vendian–Early Cambrian island-arc plagiogranitoid magmatism in the Altai–Sayan folded area and in the Lake Zone of western Mongolia (geochronological, geochemical, and isotope data): Russian Geology and Geophysics, v. 54, no. 10, p. 1272-1287.
Rudnev, S. N., Izokh, A. E., Kovach, V. P., Shelepaev, R. A., and Terent’eva, L. B., 2009, Age, composition, sources, and geodynamic environments of the origin of granitoids in the northern part of the Ozernaya zone, western Mongolia: Growth mechanisms of the Paleozoic continental crust: Petrology, v. 17, no. 5, p. 439-475.
Mongush, A., Lebedev, V., Kovach, V., Sal’nikova, E., Druzhkova, E., Yakovleva, S., Plotkina, Y. V., Zagornaya, N. Y., Travin, A., and Serov, P., 2011, The tectonomagmatic evolution of structure-lithologic complexes in the Tannu-Ola zone, Tuva, in the Late Vendian–Early Cambrian (from geochemical, Nd isotope, and geochronological data): Russian Geology and Geophysics, v. 52, no. 5, p. 503-516.
Janoušek, V., Jiang, Y., Buriánek, D., Schulmann, K., Hanžl, P., Soejono, I., Kröner, A., Altanbaatar, B., Erban, V., Lexa, O., Ganchuluun, T., and Košler, J., 2018, Cambrian–Ordovician magmatism of the Ikh-Mongol Arc System exemplified by the Khantaishir Magmatic Complex (Lake Zone, south–central Mongolia): Gondwana Research, v. 54, p. 122-149.
Yarmolyuk, V. V., Kovach, V. P., Kovalenko, V. I., Salnikova, E. B., Kozlovskii, A. M., Kotov, A. B., Yakovleva, S. Z., and Fedoseenko, A. M., 2011, Composition, sources, and mechanism of continental crust growth in the Lake zone of the Central Asian Caledonides: I. Geological and geochronological data: Petrology, v. 19, no. 1, p. 55-78.
Demoux, A., Kröner, A., Liu, D., and Badarch, G., 2009, Precambrian crystalline basement in southern Mongolia as revealed by SHRIMP zircon dating: International Journal of Earth Sciences, v. 98, no. 6, p. 1365-1380.
Kovalenko, V. I., Yarmolyuk, V. V., Sal nikova, E. B., Kartashov, P. M., Kovach, V. P., Kozakov, I. K., Kozlovskii, A. M., Kotov, A. B., Ponomarchuk, V. A., Listratova, E. N., and Yakovleva, S. Z., 2004, The Khaldzan-Buregtei Massif of Peralkaline Rare-Metal Igneous Rocks: Structure, Geochronology, and Geodynamic Setting in the Caledonides of Western Mongolia: PETROLOGY C/C OF PETROLOGIIA, v. 12,…
Soejono, I., Buriánek, D., Janoušek, V., Svojtka, M., Čáp, P., Erban, V., and Ganpurev, N., 2017, A reworked Lake Zone margin: Chronological and geochemical constraints from the Ordovician arc-related basement of the Hovd Zone (western Mongolia): Lithos, v. 294-295, p. 112-132.
Cai, K., Sun, M., Jahn, B.-m., Xiao, W., Yuan, C., Long, X., Chen, H., and Tumurkhuu, D., 2015, A synthesis of zircon U–Pb ages and Hf isotopic compositions of granitoids from Southwest Mongolia: Implications for crustal nature and tectonic evolution of the Altai Superterrane: Lithos, v. 232, p. 131-142.
Boldbaatar, D., Osanai, Y., Nakano, N., Adachi, T., Sereenen, J., Kitano, I., and Syeryekkhaan, K., 2022, Geochronology and geochemistry of granitoids from the Mongolian Altai: Journal of Mineralogical and Petrological Sciences, v. 116, no. 6, p. 293-308.
Zhang, C., Liu, L., Santosh, M., Luo, Q., and Zhang, X., 2017, Sediment recycling and crustal growth in the Central Asian Orogenic Belt: Evidence from Sr–Nd–Hf isotopes and trace elements in granitoids of the Chinese Altay: Gondwana Research, v. 47, p. 142-160.
Cai, K., Sun, M., Yuan, C., Zhao, G., Xiao, W., Long, X., and Wu, F., 2011a, Prolonged magmatism, juvenile nature and tectonic evolution of the Chinese Altai, NW China: Evidence from zircon U–Pb and Hf isotopic study of Paleozoic granitoids: Journal of Asian Earth Sciences, v. 42, no. 5, p. 949-968.
Liu, F., Li, Y.H., Mao, J.W., Yang, F.Q., Chai, F.M., Geng, X.X., Yang, Z.X., 2008. SHRIMP U–Pb Ages of the Abagong granites in the Altay orogen and their geological implications. Acta Geoscientica Sinica, 29(6), 795-804 (in Chinese with English abstract).
Wang, T., Hong, D., Jahn, B., Tong, Y., Wang, Y., Han, B., and Wang, X., 2006, Timing, petrogenesis, and setting of Paleozoic synorogenic intrusions from the Altai Mountains, Northwest China: implications for the tectonic evolution of an accretionary orogen: The Journal of Geology, v. 114, no. 6, p. 735-751.
Sun, M., Yuan, C., Xiao, W., Long, X., Xia, X., Zhao, G., Lin, S., Wu, F., and Kröner, A., 2008, Zircon U–Pb and Hf isotopic study of gneissic rocks from the Chinese Altai: Progressive accretionary history in the early to middle Palaeozoic: Chemical Geology, v. 247, no. 3-4, p. 352-383.
Cai, K., Sun, M., Yuan, C., Zhao, G., Xiao, W., Long, X., and Wu, F., 2011b, Geochronology, petrogenesis and tectonic significance of peraluminous granites from the Chinese Altai, NW China: Lithos, v. 127, no. 1-2, p. 261-281.
Yu, Y., Sun, M., Long, X., Li, P., Zhao, G., Kröner, A., Broussolle, A., and Yang, J., 2017, Whole-rock Nd–Hf isotopic study of I-type and peraluminous granitic rocks from the Chinese Altai: constraints on the nature of the lower crust and tectonic setting: Gondwana Research, v. 47, p. 131-141.
Yuan, C., Sun, M., Xiao, W., Li, X., Chen, H., Lin, S., Xia, X., and Long, X., 2007, Accretionary orogenesis of the Chinese Altai: Insights from Paleozoic granitoids: Chemical Geology, v. 242, no. 1-2, p. 22-39.
Cui, X., Sun, M., Zhao, G., Zhang, Y., Yao, J., and Han, Y., 2020a, Geochronological and geochemical study of the high-grade orthogneissic rocks from the Northern Fuyun Complex: Implications for crustal architecture and Early-Middle Paleozoic evolution of the Chinese Altai: Lithos, v. 366-367.
Cai, K., Sun, M., Yuan, C., Long, X., and Xiao, W., 2011c, Geological framework and Paleozoic tectonic history of the Chinese Altai, NW China: a review: Russian Geology and Geophysics, v. 52, no. 12, p. 1619-1633.
Lou, F. 1997. Characteristics of late Caledonian granitesin the Nuoerte area, Altay, China. Jiangxi Geol 11, 60–66 (in Chinese with English abstract).
Tong, Y., Wang, T., Hong, D., Dai, Y., Han, B., and Liu, X., 2007, Ages and origin of the early Devonian granites from the north part of Chinese Altai Mountains and its tectonic implications: Acta Petrologica Sinica, v. 23, no. 8, p. 1933-1944.
Buriánek, D., Soejono, I., Schulmann, K., Janoušek, V., Hanžl, P., Čáp, P., Bold, U., Svojtka, M., Collett, S., and Žáček, V., 2022, Subduction-controlled temporal and spatial variations in early Palaeozoic sedimentary and volcanic record of the Mongol-Altai Domain: Journal of Asian Earth Sciences, v. 230.
Yang, T. N., Li, J. Y., Zhang, J., and Hou, K. J., 2011, The Altai-Mongolia terrane in the Central Asian Orogenic Belt (CAOB): A peri-Gondwana one? Evidence from zircon U–Pb, Hf isotopes and REE abundance: Precambrian Research, v. 187, no. 1-2, p. 79-98.
Wang, Y., Yuan, C., Long, X., Sun, M., Xiao, W., Zhao, G., Cai, K., and Jiang, Y., 2011, Geochemistry, zircon U–Pb ages and Hf isotopes of the Paleozoic volcanic rocks in the northwestern Chinese Altai: Petrogenesis and tectonic implications: Journal of Asian Earth Sciences, v. 42, no. 5, p. 969-985.
Yang, C., Yang, F., Chai, F. and Wu, Y., 2017. Timing of formation of the Keketale Pb–Zn deposit, Xinjiang, Northwest China, Central Asian Orogenic Belt: Implications for the metallogeny of the South Altay Orogenic Belt. Geological Journal.
Chai, F., Mao, J., Dong, L., Yang, F., Liu, F., Geng, X., and Zhang, Z., 2009, Geochronology of metarhyolites from the Kangbutiebao Formation in the Kelang basin, Altay Mountains, Xinjiang: Implications for the tectonic evolution and metallogeny: Gondwana Research, v. 16, no. 2, p. 189-200.
Chai, F. M., Yang, F. Q., Liu, F., Geng, X. X., Jiang, L. P., Lv, S. J., and Chen, B., 2012, Geochronology and genesis of meta-felsic volcanic rocks from the Kangbutiebao formation in Chonghu'er basin on southern margin of Altay, Xinjiang. Geological Review, 58(6), 1023-1037.
Broussolle, A., Aguilar, C., Sun, M., Schulmann, K., Štípská, P., Jiang, Y., Yu, Y., Xiao, W., Wang, S., and Míková, J., 2018, Polycyclic Palaeozoic evolution of accretionary orogenic wedge in the southern Chinese Altai: Evidence from structural relationships and U–Pb geochronology: Lithos, v. 314, p. 400-424.
Yang, F., Liu, F., Li, Q., and Geng, X., 2014, In situ LA–MC–ICP–MS U–Pb geochronology of igneous rocks in the Ashele Basin, Altay orogenic belt, northwest China: Constraints on the timing of polymetallic copper mineralization: Journal of Asian Earth Sciences, v. 79, p. 477-496.
Wan, B., Xiao, W., Zhang, L., Windley, B. F., Han, C., and Quinn, C. D., 2011, Contrasting styles of mineralization in the Chinese Altai and East Junggar, NW China: implications for the accretionary history of the southern Altaids: Journal of the Geological Society, v. 168, no. 6, p. 1311-1321.
Ma, X., Cai, K., Zhao, T., Bao, Z., Wang, X., Chen, M., and Buslov, M. M., 2018, Devonian volcanic rocks of the southern Chinese Altai, NW China: Petrogenesis and implication for a propagating slab-window magmatism induced by ridge subduction during accretionary orogenesis: Journal of Asian Earth Sciences, v. 160, p. 78-94.
Cui, X., Sun, M., Zhao, G., Yao, J., Zhang, Y., Han, Y., and Dai, L., 2020b, A Devonian arc–back-arc basin system in the southern Chinese Altai: Constraints from geochemical and Sr-Nd-Pb isotopic data for meta-basaltic rocks: Lithos, v. 366-367.
Kilian, T. M., Swanson-Hysell, N. L., Bold, U., Crowley, J. and Macdonald, F. A., 2016, Paleomagnetism of the Teel basalts from the Zavkhan terrane: Implications for Paleozoic paleogeography in Mongolia and the growth of continental crust: Lithosphere v. 8, p. 699–715.

## Sheet: Sheet3
Table S3. Tectono-metamorphic events recorded in different terranes of the Altai Zone.
Terrane	Deformation event	Foliations	Deformation	Deformation direction	Metamorphic event and type	Peak P-T condition	Metamorphic field gradient	Time	Dating samples/other age data	Reference
Hovd Zone	D1	sub-vertical S1, folds F1	horizontal shortening	crustal burial	M1 (MP/MT)	5.5–5.9 kbar, 590–610 °C	c. 30 °C/km	ca. 455 Ma	monazite ages	Soejono et al., 2021
	D2	sub-horizontal S2, isoclinal folds F2	crustal extension	crustal thinning	M2 (LP/HT)	4.5 kbar, 630–690 °C	c. 38-44 °C/km	ca. 435 Ma	monazite ages; 430 Ma intra-plate magmatism	Soejono et al., 2021
	D3	sub-vertical S3, upright folds F3	crustal shortening	NE-SW compression				ca. 385 Ma	recrystallized monazite ages	Soejono et al., 2021
	D4	kink-bands, open folds F4	crustal shortening	NNE–SSW compression				younger than ealry Carboniferous	affects the early Carboniferous sequence	Soejono et al., 2021
Gobi Altai-Tseel massif	D1	-	crustal thickening	crustal burial	M1 (MP/MT)	4.5–7 kbar, 520–570 °C	c. 30 °C/km	inferred ca. 420-430 Ma	minor metamorphic zircon age peaks in staurolite and cordiorite zone samples	Burenjargal et al., 2014
	D2	-	heat input		M2 (LP/HT)	3–6 kbar, 570–680 °C	c. 35-45 °C/km	377 ± 30 Ma (last for ca. 100 Ma)	metamorphic zircon ages in the cordierite zone sample	Burenjargal et al., 2014
Gobi Altai-Chandman massif	D1	sub-horizontal S1	heat input		M1 (MP/MT)	6–7 kbar, 710–780 °C	c. 30 °C/km	not determined; inferred ca. 385 Ma		Broussolle et al., 2015
	D2	vertical S2, upright folds F2	crustal shortening and exhumation		M2 (LP/HT)	3–4 kbar, 680–750 °C	c. 50 °C/km	ca. 365 Ma (until c. 345 Ma)	monazite ages; amphibole and muscovite 40Ar/39Ar cooling ages ranging from 364 to 353 Ma	Broussolle et al., 2015
	D3	steep S3	horizontal shortening	E-W to NNE-SSW compression				Permian		Broussolle et al., 2015
Chinese Altai	D1	sub-horizontal S1B	crustal thickening	crustal burial	M1 (MP/MT)	7.3 kbar and 593 °C	c. 24 °C/km	before 400 Ma; ca. 430 Ma?	400 Ma granites crosscutting the S1B foliation; ca. 430 Ma zircon age from phyllite	Jiang et al., 2021
	D1	sub-horizontal S1M	crustal extension	decompression	M1 (LP/HT)	5.6–6.0 kbar, 660–670 °C	c. 34 °C/km	ca. 400-380 Ma	metamorphic zircon rims in migmatitic paragneisses, monazite ages, granite sheets ages	Jiang et al., 2019
	D2	subvertical S2, upright folds F2	crustal shortening and exhumation	NW-SE compression	M2 (LP)	4 kbar, 500 °C	c. 38 °C/km	inferred late Devonian-early Carboniferous		Jiang et al., 2019
	D3	subvertical S3, upright folds F3	crustal shortening	NE-SW compression	M3 (LP/HT)	3–4 kbar and 530–600 °C (low strain zone); 4.3–5.0 kbar and 630–650 °C (high strain zone)	c. 48 °C/km; c. 41 °C/km	280–273 Ma	monazite recrystallization ages	Jiang et al., 2019
References:
Soejono, I., Peřestý, V., Schulmann, K., Čopjaková, R., Svojtka, M., Štípská, P., Buriánek, D., Janoušek, V., and Lexa, O., 2021, Structural, metamorphic and geochronological constraints on Palaeozoic multi-stage geodynamic evolution of the Altai accretionary wedge system (Hovd Zone, western Mongolia): Lithos, v. 396-397.
Burenjargal, U., Okamoto, A., Kuwatani, T., Sakata, S., Hirata, T., and Tsuchiya, N., 2014, Thermal evolution of the Tseel terrane, SW Mongolia and its relation to granitoid intrusions in the Central Asian Orogenic Belt: Journal of Metamorphic Geology, v. 32, no. 7, p. 765-790.
Broussolle, A., Štípská, P., Lehmann, J., Schulmann, K., Hacker, B., Holder, R., Kylander‐Clark, A., Hanžl, P., Racek, M., and Hasalová, P., 2015, P–T–t–D record of crustal‐scale horizontal flow and magma‐assisted doming in the SW Mongolian Altai: Journal of Metamorphic Geology, v. 33, no. 4, p. 359-383.
Jiang, Y., Štípská, P., Schulmann, K., Aguilar, C., Wang, S., Anczkiewicz, R., Zhang, J., Li, P., and Chopin, F., 2022, Barrovian and Buchan metamorphic series in the Chinese Altai: P–T–t–D evolution and tectonic implications: Journal of Metamorphic Geology, p. 1-35.
Jiang, Y. D., Schulmann, K., Sun, M., Weinberg, R. F., Štípská, P., Li, P. F., Zhang, J., Chopin, F., Wang, S., Xia, X. P., and Xiao, W. J., 2019, Structural and Geochronological Constraints on Devonian Suprasubduction Tectonic Switching and Permian Collisional Dynamics in the Chinese Altai, Central Asia: Tectonics, v. 38, no. 1, p. 253-280.
